# Supplementary material
Source: MDPI journal article supplement (https://www.mdpi.com/2075-163X/9/10/575)
Supplement: s1 [file s1]

### Supplementary Material 1 – S1

**S1.** Major element concentrations of glassy shards and pumice fragments in *Villa del Pezzolo* mortars of group A (in wt.%, recalculated to 100%; bdl: below detection limits). Na<sub>2</sub>O+K<sub>2</sub>O (in wt.%) also shown.

|                                       | Glassy shards |        |        |        |        |        | Pumice |        |        |        |        |        |
|---------------------------------------|---------------|--------|--------|--------|--------|--------|--------|--------|--------|--------|--------|--------|
| wt.%                                  | VP1           | VP2    | VP3    | VP4    | VP5    | VP6    | VP1    | VP2    | VP3    | VP4    | VP5    | VP6    |
| <b>SiO<sub>2</sub></b>                | 62.24         | 61.35  | 61.59  | 62.14  | 62.56  | 61.82  | 61.10  | 60.23  | 61.69  | 61.66  | 60.05  | 60.21  |
| <b>TiO<sub>2</sub></b>                | 0.64          | 0.43   | 0.30   | 0.55   | 0.52   | 0.66   | 0.49   | 0.75   | 0.88   | 0.37   | 0.48   | 0.12   |
| <b>Al<sub>2</sub>O<sub>3</sub></b>    | 18.95         | 19.74  | 18.91  | 18.53  | 18.78  | 18.46  | 19.5   | 18.51  | 18.81  | 18.61  | 17.8   | 17.85  |
| <b>Fe<sub>2</sub>O<sub>3</sub></b>    | 2.68          | 2.24   | 2.61   | 2.99   | 2.46   | 2.54   | bdl    | 0.13   | 0.41   | 0.21   | bdl    | bdl    |
| <b>MnO</b>                            | 0.22          | 0.38   | bdl    | 0.24   | bdl    | 0.24   | bdl    | 0.04   | bdl    | bdl    | 0.23   | 0.18   |
| <b>MgO</b>                            | 0.23          | 0.19   | 0.31   | 0.20   | 0.25   | 0.33   | 1.56   | 1.54   | 0.26   | 0.31   | 1.07   | 0.67   |
| <b>CaO</b>                            | 2.24          | 1.41   | 1.86   | 1.40   | 1.98   | 2.13   | 6.13   | 6.62   | 1.81   | 1.95   | 3.76   | 3.16   |
| <b>Na<sub>2</sub>O</b>                | 7.47          | 5.74   | 5.85   | 5.83   | 6.56   | 7.24   | 3.73   | 3.44   | 5.18   | 6.03   | 3.51   | 3.32   |
| <b>K<sub>2</sub>O</b>                 | 5.75          | 7.55   | 6.65   | 7.51   | 6.21   | 6.02   | 8.23   | 9.87   | 7.52   | 7.12   | 3.21   | 3.63   |
| <b>P<sub>2</sub>O<sub>5</sub></b>     | bdl           | 0.14   | 0.20   | 0.05   | 0.01   | 0.11   | 0.35   | 0.37   | bdl    | bdl    | 9.54   | 9.86   |
| <b>BaO</b>                            | bdl           | bdl    | bdl    | 0.57   | 0.31   | bdl    | 6.07   | 6.01   | 2.76   | 3.17   | 0.31   | 0.03   |
| <b>SO<sub>3</sub></b>                 | 0.19          | 0.12   | 0.12   | 0.02   | 0.05   | 0.13   | 0.30   | 0.08   | 0.13   | bdl    | bdl    | bdl    |
| <b>Cl<sup>-</sup></b>                 | 0.34          | 0.70   | 0.46   | 0.50   | 0.31   | 0.32   | 0.46   | 0.44   | 0.83   | 0.82   | 0.51   | 0.65   |
| <b>Total</b>                          | 100.00        | 100.00 | 100.00 | 100.00 | 100.00 | 100.00 | 100.00 | 100.00 | 100.00 | 100.00 | 100.00 | 100.00 |
| <b>Na<sub>2</sub>O+K<sub>2</sub>O</b> | 13.22         | 13.29  | 12.5   | 13.34  | 12.77  | 13.26  | 11.96  | 13.30  | 12.70  | 13.14  | 12.75  | 13.49  |
