# Supplementary material
Source: MDPI journal article supplement (https://www.mdpi.com/2075-163X/9/10/575)
Supplement: s1 [file s1]

## Supplementary Material 2 – S2

**S2.** Major element concentrations of pumice fragments the *Villa del Pezzolo* mortars of groups B and C (in wt.%, recalculated to 100%; below detection limits). Na<sub>2</sub>O+K<sub>2</sub>O (in wt.%) also shown.

|                                       | Pumice |        |        |        |        |        |        |        |        |        |        |        |        |        |
|---------------------------------------|--------|--------|--------|--------|--------|--------|--------|--------|--------|--------|--------|--------|--------|--------|
| wt.%                                  | VP7    | VP8    | VP9    | VP10   | VP11   | VP12   | VP13   | VP14   | VP15   | VP16   | VP17   | VP18   | VP19   | VP20   |
| SiO <sub>2</sub>                      | 54.93  | 55.38  | 54.79  | 54.53  | 54.6   | 54.35  | 54.88  | 55.43  | 55.63  | 54.85  | 55.54  | 54.32  | 54.37  | 54.25  |
| TiO <sub>2</sub>                      | 0.29   | 0.46   | 0.16   | 0.38   | 0.71   | 0.33   | 0.04   | 0.34   | 0.5    | 0.45   | 0.52   | 0.35   | 0.48   | 0.53   |
| Al <sub>2</sub> O <sub>3</sub>        | 20.63  | 21.13  | 20.55  | 20.31  | 20.47  | 22.97  | 20.98  | 20.45  | 21.02  | 21.01  | 20.47  | 20.53  | 21.03  | 20.02  |
| Fe <sub>2</sub> O <sub>3</sub>        | 0.18   | 0.23   | 0.07   | bdl    | 0.36   | bdl    | bdl    | 0.34   | bdl    | 0.47   | 0.17   | 0.24   | 0.08   | 0.18   |
| MnO                                   | bdl    | bdl    | 0.17   | 0.27   | bdl    | 0.03   | 0.06   | 0.13   | 0.14   | bdl    | bdl    | 0.17   | 0.19   | bdl    |
| MgO                                   | 0.38   | 0.66   | 0.61   | 0.50   | 0.44   | 0.10   | 0.34   | 0.44   | 0.34   | 0.43   | 0.67   | 0.56   | 0.51   | 0.64   |
| BaO                                   | 3.64   | 4.21   | 3.34   | 3.48   | 3.09   | 3.72   | 4.06   | 3.48   | 3.28   | 3.68   | 3.37   | 3.85   | 3.46   | 4.03   |
| CaO                                   | 5.22   | 4.75   | 4.76   | 4.88   | 5.32   | 4.52   | 4.14   | 4.29   | 4.7    | 4.29   | 4.79   | 4.96   | 3.92   | 4.87   |
| Na <sub>2</sub> O                     | 6.06   | 6.10   | 5.12   | 5.01   | 6.45   | 6.99   | 6.21   | 5.86   | 6.00   | 6.15   | 6.68   | 6.73   | 5.8    | 5.35   |
| K <sub>2</sub> O                      | 6.77   | 6.50   | 9.11   | 9.26   | 6.98   | 6.09   | 8.43   | 8.32   | 7.23   | 7.5    | 6.47   | 7.14   | 9.14   | 8.88   |
| P <sub>2</sub> O <sub>5</sub>         | 0.28   | 0.18   | bdl    | 0.18   | 0.24   | bdl    | 0.18   | 0.15   | bdl    | 0.15   | 0.15   | 0.27   | 0.04   | 0.10   |
| SO <sub>3</sub>                       | 0.14   | 0.11   | bdl    | 0.10   | 0.46   | 0.07   | bdl    | 0.05   | 0.22   | 0.16   | 0.22   | bdl    | 0.21   | 0.18   |
| Cl <sup>-</sup>                       | 0.92   | 0.71   | 0.62   | 0.66   | 0.58   | 0.30   | 0.75   | 0.70   | 0.89   | 0.86   | 0.91   | 0.68   | 0.62   | 0.90   |
| <b>Total</b>                          | 100.00 | 100.00 | 100.00 | 100.00 | 100.00 | 100.00 | 100.00 | 100.00 | 100.00 | 100.00 | 100.00 | 100.00 | 100.00 | 100.00 |
| <b>Na<sub>2</sub>O+K<sub>2</sub>O</b> | 12.83  | 12.60  | 14.23  | 14.27  | 13.43  | 13.08  | 14.64  | 14.18  | 13.23  | 13.65  | 13.15  | 13.87  | 14.94  | 14.23  |
