# Supplementary material
Source: MDPI journal article supplement (https://www.mdpi.com/2075-163X/9/10/575)
Supplement: s1 [file s1]

### Supplementary Material 3 – S3

S3. Representative chemical composition (wt.%, EDS) of garnets.

|                                      | VP6<br>garnet | VP10<br>garnet | VP12<br>garnet | VP15<br>garnet | VP16<br>garnet | VP19<br>garnet |
|--------------------------------------|---------------|----------------|----------------|----------------|----------------|----------------|
| SiO <sub>2</sub>                     | 35.64         | 34.99          | 35.41          | 35.80          | 35.22          | 34.39          |
| TiO <sub>2</sub>                     | 2.97          | 2.93           | 2.60           | 2.54           | 3.02           | 2.17           |
| Al <sub>2</sub> O <sub>3</sub>       | 8.53          | 8.49           | 9.02           | 8.97           | 8.99           | 8.54           |
| Cr <sub>2</sub> O <sub>3</sub>       | -             | -              | -              | -              | 0.15           | -              |
| V <sub>2</sub> O <sub>3</sub>        | -             | 0.19           | 0.28           | 0.55           | -              | 0.16           |
| FeO <sub>tot</sub>                   | 17.81         | 18.59          | 17.16          | 18.13          | 17.81          | 18.11          |
| MnO                                  | 1.38          | 1.08           | 1.30           | 1.34           | 1.06           | 1.45           |
| MgO                                  | 0.20          | 0.20           | 0.23           | 0.17           | 0.23           | 0.36           |
| CaO                                  | 31.19         | 31.10          | 31.55          | 32.60          | 31.23          | 31.54          |
| Na <sub>2</sub> O                    | 0.02          | 0.17           | -              | -              | -              | -              |
| Total (calc)                         | 97.74         | 97.74          | 97.54          | 100.09         | 97.72          | 96.71          |
| <b>Recalculated (wt%)</b>            |               |                |                |                |                |                |
| final FeO                            | 3.50          | 2.42           | 2.56           | 1.65           | 3.34           | 0.56           |
| final Fe <sub>2</sub> O <sub>3</sub> | 15.90         | 17.98          | 16.23          | 18.31          | 16.09          | 19.50          |
| final MnO                            | 1.38          | 1.08           | 1.30           | 1.34           | 1.06           | 1.45           |
| final Mn <sub>2</sub> O <sub>3</sub> | 0.00          | 0.00           | 0.00           | 0.00           | 0.00           | 0.00           |
| Total                                | 99.33         | 99.55          | 99.18          | 101.92         | 99.34          | 98.66          |
| <b>End-members</b>                   |               |                |                |                |                |                |
| <i>Schorlomite-Al</i>                | 4.14%         | 6.82%          | 5.17%          | 7.10%          | 5.96%          | 6.73%          |
| Morimotoite                          | 9.71%         | 1.74%          | 5.68%          | 1.04%          | 6.68%          | -              |
| NaTi garnet                          | 0.16%         | 1.33%          | -              | -              | -              | -              |
| Goldmanite                           | -             | 0.63%          | 0.91%          | 1.76%          | -              | 0.52%          |
| Uvarovite                            | -             | -              | -              | -              | 0.47%          | -              |
| Spessartine                          | 3.18%         | 2.50%          | 2.99%          | 3.02%          | 2.45%          | 3.38%          |
| Pyrope                               | 0.80%         | 0.80%          | 0.91%          | 0.69%          | 0.93%          | 1.47%          |
| Almandine                            | 4.75%         | 4.93%          | 3.93%          | 3.32%          | 5.39%          | 1.30%          |
| <b>Grossular</b>                     | <b>28.28%</b> | <b>25.91%</b>  | <b>30.46%</b>  | <b>28.05%</b>  | <b>28.60%</b>  | <b>27.37%</b>  |
| <b>Andradite</b>                     | <b>48.98%</b> | <b>55.35%</b>  | <b>49.94%</b>  | <b>55.02%</b>  | <b>49.50%</b>  | <b>58.38%</b>  |
| Remainder                            | 0.00%         | 0.00%          | 0.00%          | 0.00%          | 0.00%          | 0.87%          |
| Total                                | 100.00%       | 100.01%        | 99.99%         | 100.00%        | 99.98%         | 100.02%        |
| Quality Index                        | Superior      | Superior       | Superior       | Superior       | Superior       | Excellent      |

The quality index represents the quality of a garnet analysis, calculated with Locock file [37]
